# Supplementary material
Source: MDPI journal article supplement (https://www.mdpi.com/1424-2818/15/8/913)
Supplement: s1 [file s1]

**Table S1.** Details of the sampling sites and number of Korean spotted sleeper *Odontobutis interrupta*

| Location               | Code | Water system        | N  | Location               |
|------------------------|------|---------------------|----|------------------------|
| Oknyeodongcheon stream | SOD  | Seomjingang River   | 23 | 35°39'43"N 127°09'09"E |
| Churyungcheon stream   | SCR  | Seomjingang River   | 21 | 35°26'05"N 126°56'02"E |
| Galdamcheon stream     | SGD  | Seomjingang River   | 24 | 35°31'35"N 127°09'21"E |
| Wonjucheon stream      | HWJ  | Hangang River       | 20 | 37°22'59"N 127°56'30"E |
| Dumicheon stream       | HDM  | Hangang River       | 20 | 37°41'39"N 127°40'06"E |
| Dalcheon stream        | HDC  | Hangang River       | 23 | 36°36'55"N 127°42'06"E |
| Jahocheon stream       | NJH  | Nakdonggang River   | 22 | 36°01'06"N 128°58'43"E |
| Migokcheon stream      | NMG  | Nakdonggang River   | 23 | 35°34'50"N 128°20'44"E |
| Gapcheon stream        | GGP  | Geumgang River      | 23 | 36°19'04"N 127°21'12"E |
| Nonsan Stream          | GNS  | Geumgang River      | 22 | 36°10'31"N 127°08'31"E |
| Bogangcheon stream     | GBG  | Geumgang River      | 23 | 36°48'22"N 127°36'59"E |
| Namcheon stream        | HSNC | Hyeongsangang River | 23 | 35°49'42"N 129°12'05"E |

N: Number of samples.

**Table S2.** Summary of microsatellite screening and raw data of sequencing in *Odontobutis interrupta*.

| Short reads                  | Total reads | Total read length (bp) |
|------------------------------|-------------|------------------------|
| Raw data                     | 4,075,232   | 1,083,799,779          |
| <b>Microsatellite search</b> |             |                        |
| Contig                       |             | 101068                 |
| Di-nucleotide                |             | 1282                   |
| Tri-nucleotide               |             | 2456                   |
| Tetra-nucleotide             |             | 1675                   |
| Penta-nucleotide             |             | 190                    |
| Hexa-nucleotide              |             | 50                     |

**Table S3.** Details of microsatellite loci in *Odontobutis interrupta*

| Locus | Primer sequence (5'→ 3')                                                 | Motif repeat         | Product size (bp) | Dye | N<br>(HDM=8,<br>GBG=9,<br>SGD=8) | N <sub>A</sub> | H <sub>O</sub> | H <sub>E</sub> | PIC   | Null allele | GenBank Accession no. |
|-------|--------------------------------------------------------------------------|----------------------|-------------------|-----|----------------------------------|----------------|----------------|----------------|-------|-------------|-----------------------|
| Oin3  | F:<br>TGTAACGACGGCCAGTAATTGAACCCTGTGAATGCC<br>R: TGATGCCAATTGTACTCGCT    | (CAT) <sub>24</sub>  | 274               | PET | 25                               | 12             | 0.640          | 0.842          | 0.808 | X           | OQ656882              |
| Oin27 | F:<br>TGTAACGACGGCCAGTGCCTGTATTTGAATTC TCG<br>R: GGGCATCCGACGTAAACT      | (TTCT) <sub>14</sub> | 278               | NED | 25                               | 9              | 0.760          | 0.867          | 0.832 | X           | OQ656883              |
| Oin29 | F:<br>TGTAACGACGGCCAGTGTAGCTTGGGTGAATCAGGC<br>R: CATATGCGACACAAGGTTGG    | (GT) <sub>13</sub>   | 271               | NED | 25                               | 5              | 0.760          | 0.675          | 0.622 | X           | OQ656884              |
| Oin40 | F:<br>TGTAACGACGGCCAGTTTGTGTTTTAATTCTGGCTTTT<br>R: CATCTCATGAATCACCAGGAA | (AATG) <sub>12</sub> | 279               | NED | 25                               | 11             | 0.840          | 0.888          | 0.857 | X           | OQ656885              |

N: Number of samples, N<sub>A</sub>: Number of alleles, H<sub>O</sub>: Observed heterozygosity, H<sub>E</sub>: Expected heterozygosity, PIC: Polymorphic information content.
